# Supplementary material for: DOT1L safeguards cartilage homeostasis and protects against osteoarthritis
Source: PubMed Central journal article supplement (PMC5481839; doi:10.1038/ncomms15889), 2017-06-19
Supplement: ncomms15889-s1.pdf [file ncomms15889-s1.pdf]

Type of file: PDF

Title of file for HTML: Supplementary Information

Description: Supplementary Figures and Supplementary Tables

Type of file: PDF

Title of file for HTML: Peer Review File

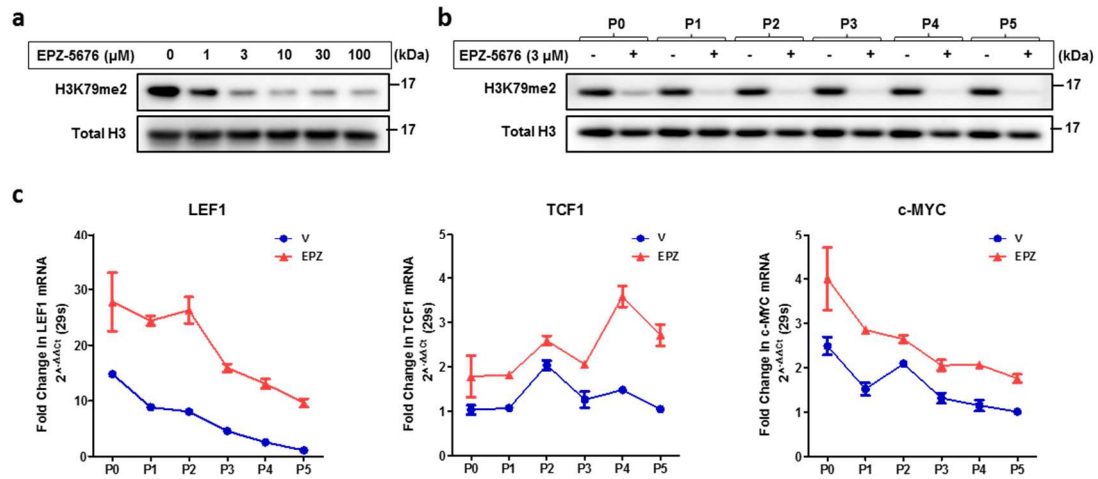

**Supplementary Figure 1 | DOT1L inhibition in a chondrocyte dedifferentiation assay.** (a,b) Immunoblot analysis showing decreased methylated H3K79 levels (H3K79me2) in human articular chondrocytes: treated with EPZ-5676 (EPZ) at the indicated concentrations or vehicle (V) for 4 days (a) or treated with 3 μM EPZ from passage 0 (P0) to P5 (b). The image is representative of one experiment. (c) Messenger RNA expression levels determined by quantitative PCR for *LEF1*, *TCF1* and *c-MYC* in human articular chondrocytes from P0 until P5 treated with EPZ-5676 or vehicle. Data are from one experiment with technical triplicates. Error bars indicate mean  $\pm$  s.e.m.

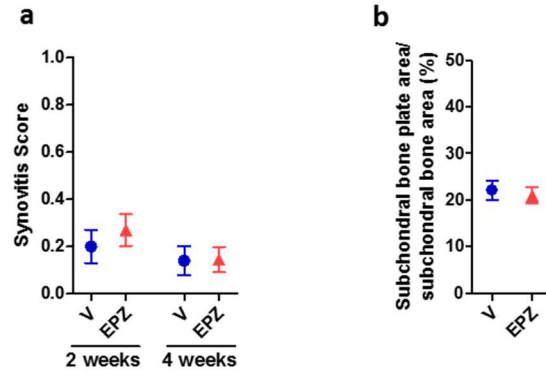

**Supplementary Figure 2 | Severity of synovitis and extent of subchondral bone remodeling in DOT1L inhibitor-injected mice.** C57/Bl6 wild-type mouse knees were injected with EPZ (5 mg/kg) or vehicle and sacrificed after 2 or 4 weeks. Knees were sectioned and stained with Hematoxylin-Safranin O. Synovitis was scored (see Methods) and is shown in (a). Subchondral bone plate histomorphometry at the medial and lateral side of the tibia at 4 weeks was performed (see Methods) and is shown in (b). One experiment was performed with n=10 and 5 respectively. Error bars indicate mean  $\pm$  s.e.m.

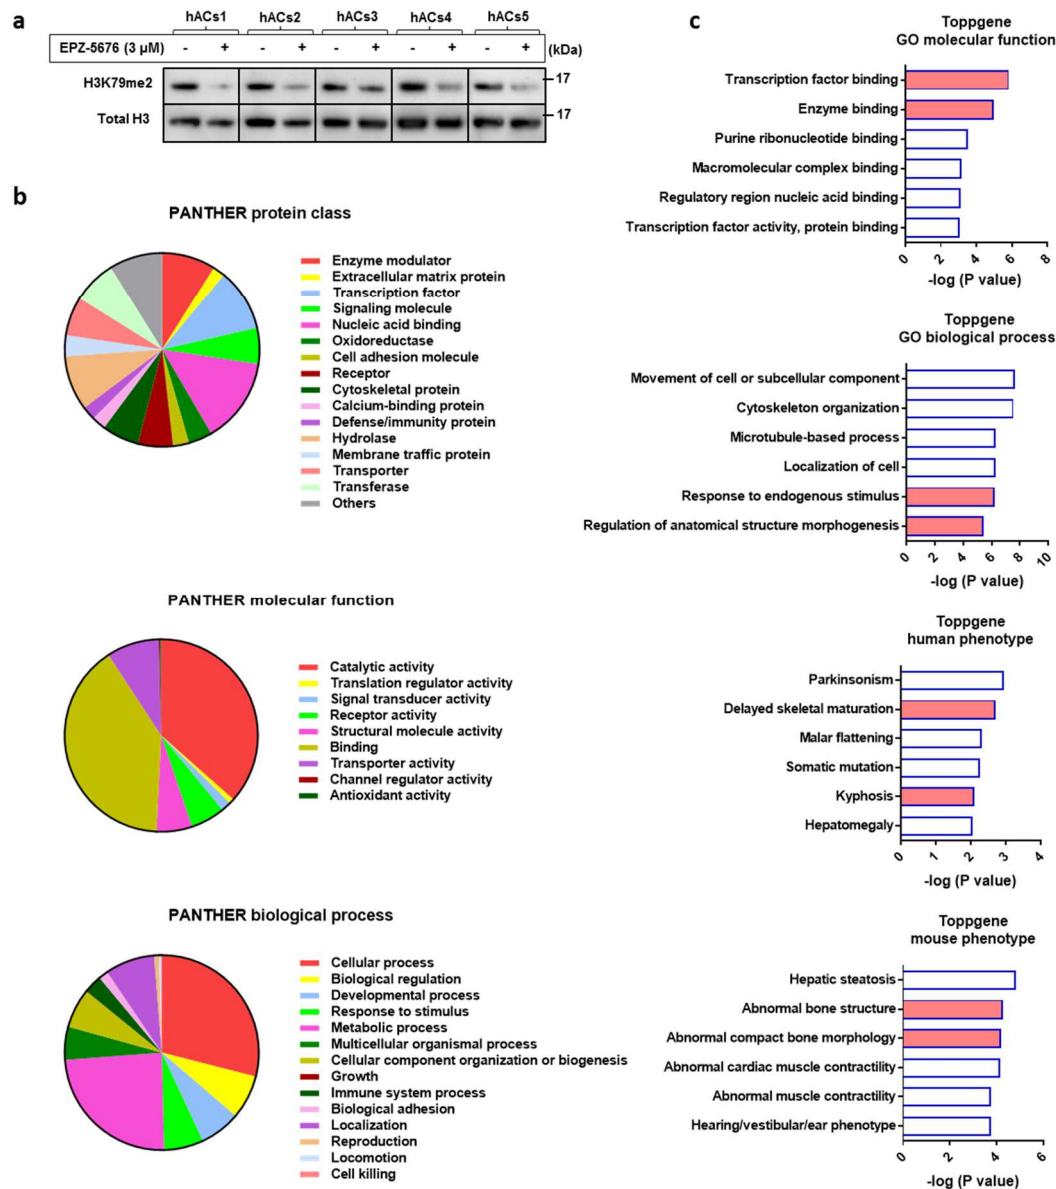

**Supplementary Figure 3 | Transcriptome network analysis of DOT1L inhibition in primary human articular chondrocytes.** (a) Immunoblot analysis of methylated H3K79 protein levels in 3  $\mu$ M EPZ-5676 or vehicle-treated human articular chondrocytes (during 4 days) from 5 different donors (hACs1-hACs5). (b) Pie charts representing different categories of transcripts regulated by DOT1L using the “GO-slim” and Protein class ontology of the PANTHER Database. (c) Top six gene set enrichments as analysed by Toppgenesuite in the indicated categories.

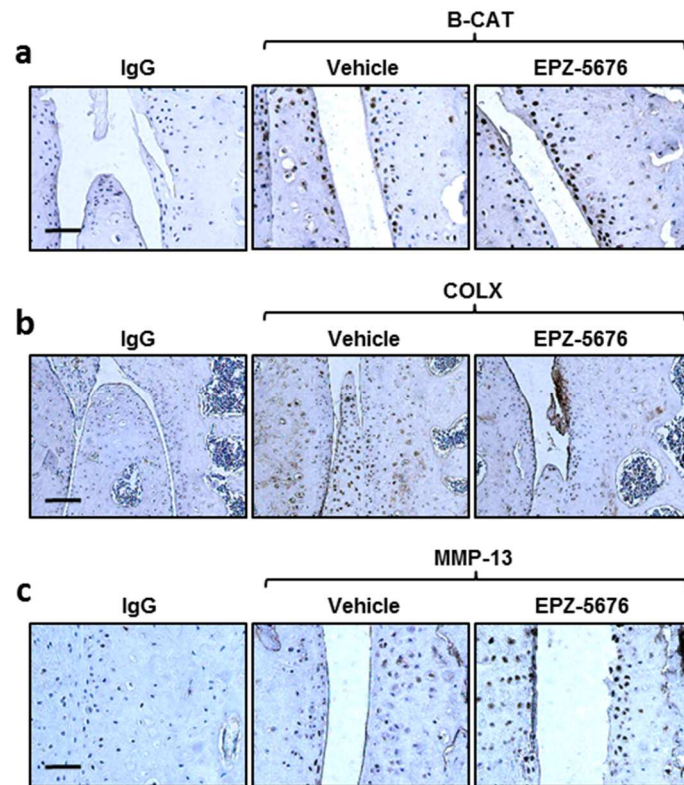

**Supplementary Figure 4 | *In vivo* DOT1L inhibition triggers articular chondrocyte hypertrophy.** (a,b,c) Immunohistochemistry of beta-catenin (B-CAT) (a), type-X Collagen (COLX) (b) and matrix metalloproteinase-13 (MMP-13) (c) in the articular cartilage of C57/Bl6 wild-type mice after injection of EPZ-5676. DOT1L inhibition did not result in detectable changes in B-CAT immunostaining. Hypertrophy markers COLX and MMP-13 are increased after EPZ-5676 treatment, particularly in the vicinity of the lesions. The images are representative of 3 different animals. Scale bar, 50  $\mu$ m (a, c) or 100  $\mu$ m (b).

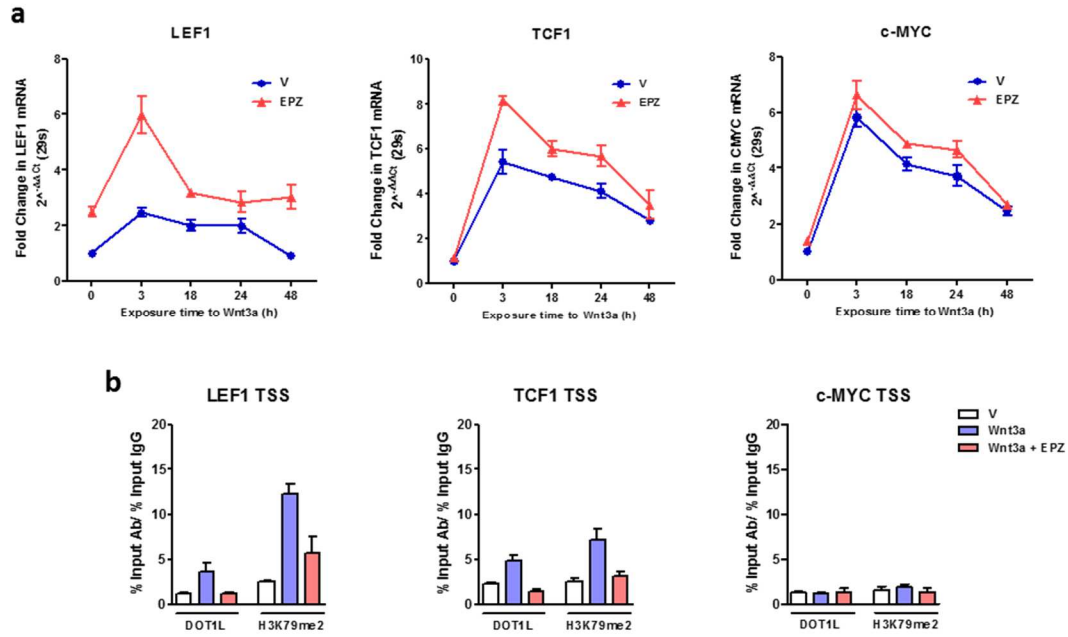

**Supplementary Figure 5 | Effects of recombinant Wnt3a on DOT1L-inhibited chondrocytes.** (a) *LEF1*, *TCF1* and *c-MYC* expression measured by quantitative PCR in human articular chondrocytes treated with EPZ-5676 and recombinant Wnt3a. Data are from one experiment with three technical replicates. (b) ChIP-qPCR analysis of DOT1L and methylated H3K79 on the transcriptional start site (TSS) of Wnt target genes. Data are from 2 experiments. Error bars indicate mean  $\pm$  s.e.m.

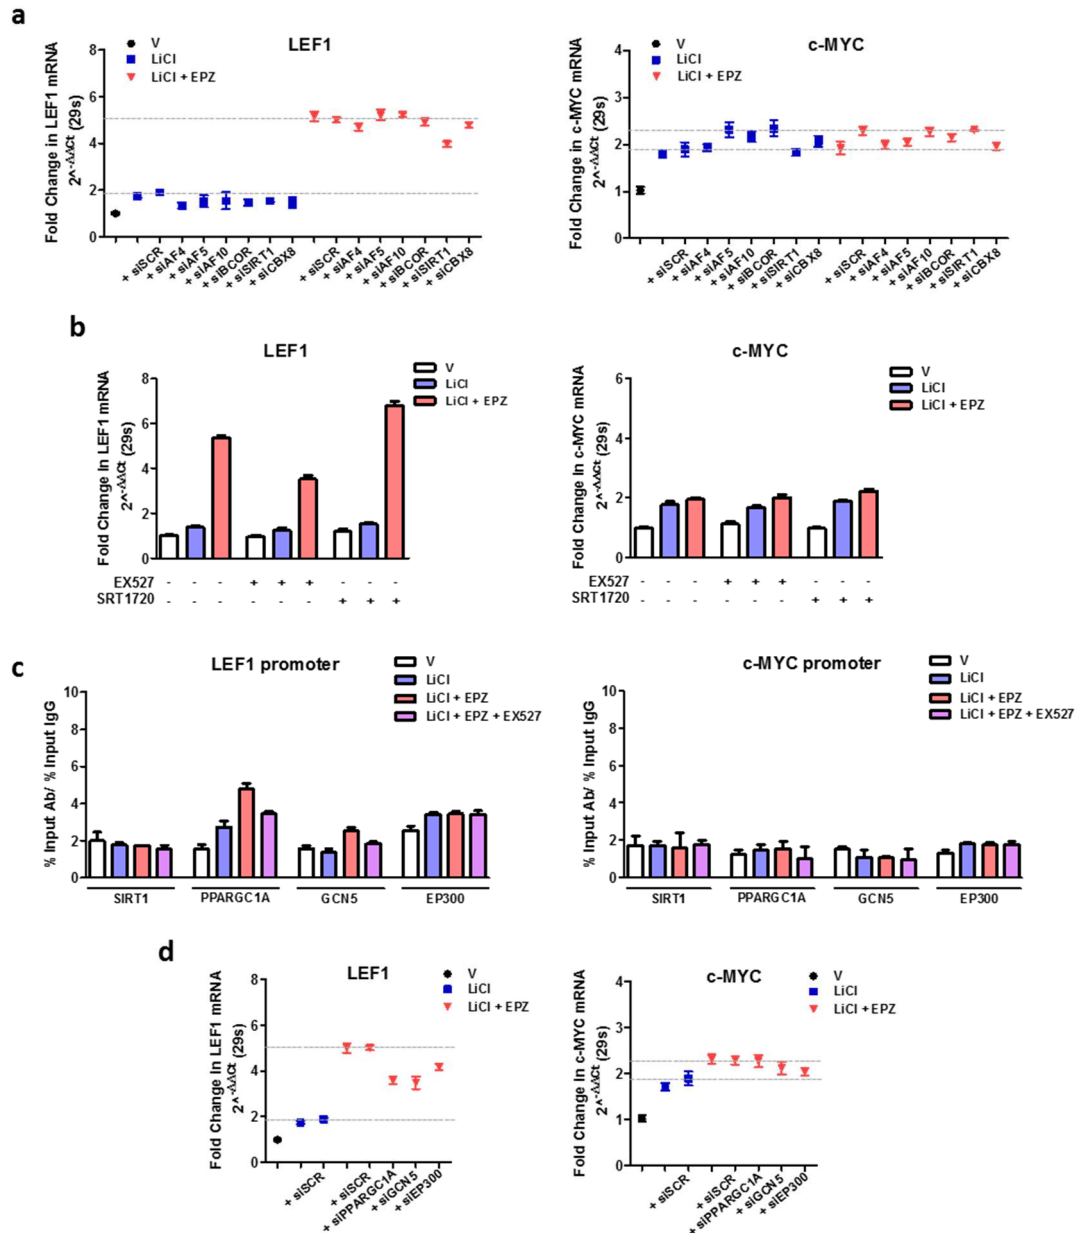

**Supplementary Figure 6 | Effects of SIRT1 and associated transcriptional activators on *LEF1* and *c-MYC* expression upon DOT1L inhibition.** All experiments were performed in healthy human articular chondrocytes, treated as indicated with DOT1L inhibitor EPZ-5676, Wnt activator LiCl, SIRT1 antagonist EX527 or SIRT1 agonist SRT1720. All data are presented as mean  $\pm$  s.e.m. **(a)** Expression levels of *LEF1* and *c-MYC* Wnt target genes measured by quantitative PCR in chondrocytes transfected with indicated specific or scrambled siRNA (siSCR). Data are from one experiment with technical triplicates. **(b)** *LEF1* and *c-MYC* expression measured by quantitative PCR in the presence of a SIRT1 agonist or antagonist. Data from 2 experiments each with technical triplicates. **(c)** ChIP-qPCR analysis of SIRT1,

PPARGC1A, GCN5 and EP300 binding on the *LEF1* and *c-MYC* promoter and **(d)** *LEF1* and *c-MYC* expression after siRNA transfection with indicated specific or scrambled siRNA. Data from 2 biologically independent experiments.



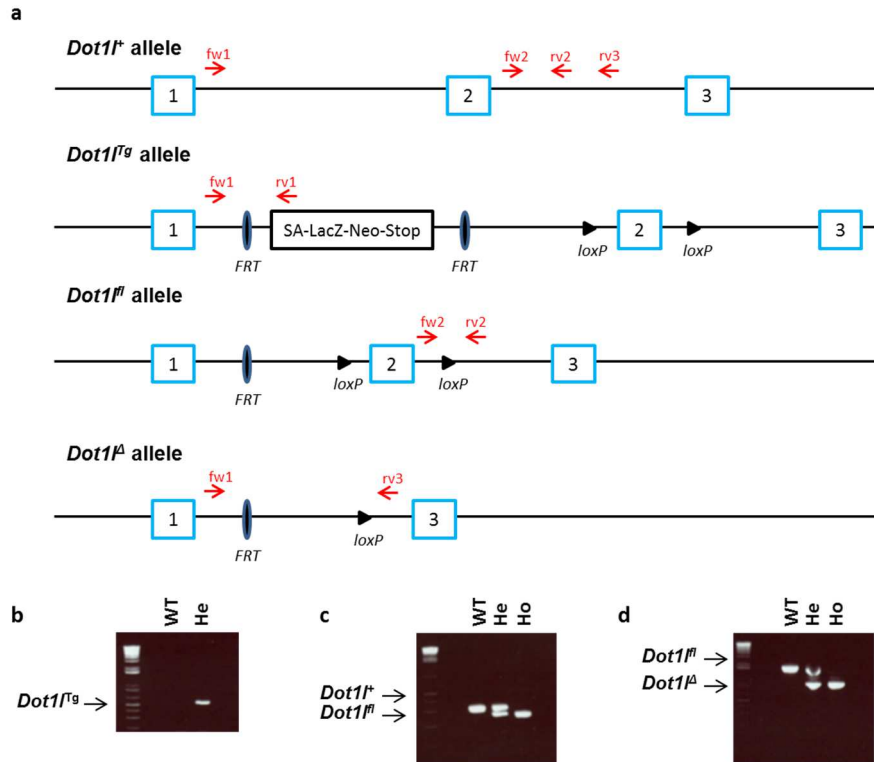

### Supplementary Figure 7 | Generation of cartilage-specific *Dot1l*<sup>Δ</sup> knockout mice.

(a) *Dot1l*<sup>Tg/+</sup> mice (Knockout Mouse Project (KOMP) (CSD29070)) were crossed with FLP-transgenic mice to obtain floxed *Dot1l* mice (*Dot1l*<sup>fl/+</sup>). These mice were bred to *Col2*-Cre mice to generate conditional cartilage-specific *Dot1l*<sup>Δ</sup> knockout mice. Loss of exon 2 (*Dot1l*<sup>Δ/Δ</sup>) led to a non-functional frame shift mutation. (b-d) Genotyping of *Dot1l*<sup>+</sup>, *Dot1l*<sup>Tg</sup>, *Dot1l*<sup>fl</sup> and *Dot1l*<sup>Δ</sup> knockout mice. Loss of exon 2 (*Dot1l*<sup>Δ/Δ</sup>) led to a non-functional frame shift mutation. (b-d) Genotyping of *Dot1l*<sup>+</sup>, *Dot1l*<sup>Tg</sup>, *Dot1l*<sup>fl</sup> and *Dot1l*<sup>Δ</sup> alleles. (WT: wildtype, He: heterozygous, Ho: homozygous knockout).

(fw1: GAAGACTGTCTAGAGACTTAGGGTTGTGGGGCA,

rv1: CCAACTGACCTTGGGCAAGAACAT pair: *Dot1l*<sup>Tg</sup> (503bp);

fw2: GAGGCATCTCTCCATGACCCTTGTCTGGGAA,

rv2: AGGAACCACAGGATGCTTCA pair: *Dot1l*<sup>+</sup> (313bp) and *Dot1l*<sup>fl</sup> (265bp);

fw1, rv3: AAGGGTGTGGGTGGGCCTTCTTAGGTTAGGTATGT pair: *Dot1l*<sup>fl</sup> (1524bp) and *Dot1l*<sup>Δ</sup> (841bp)).

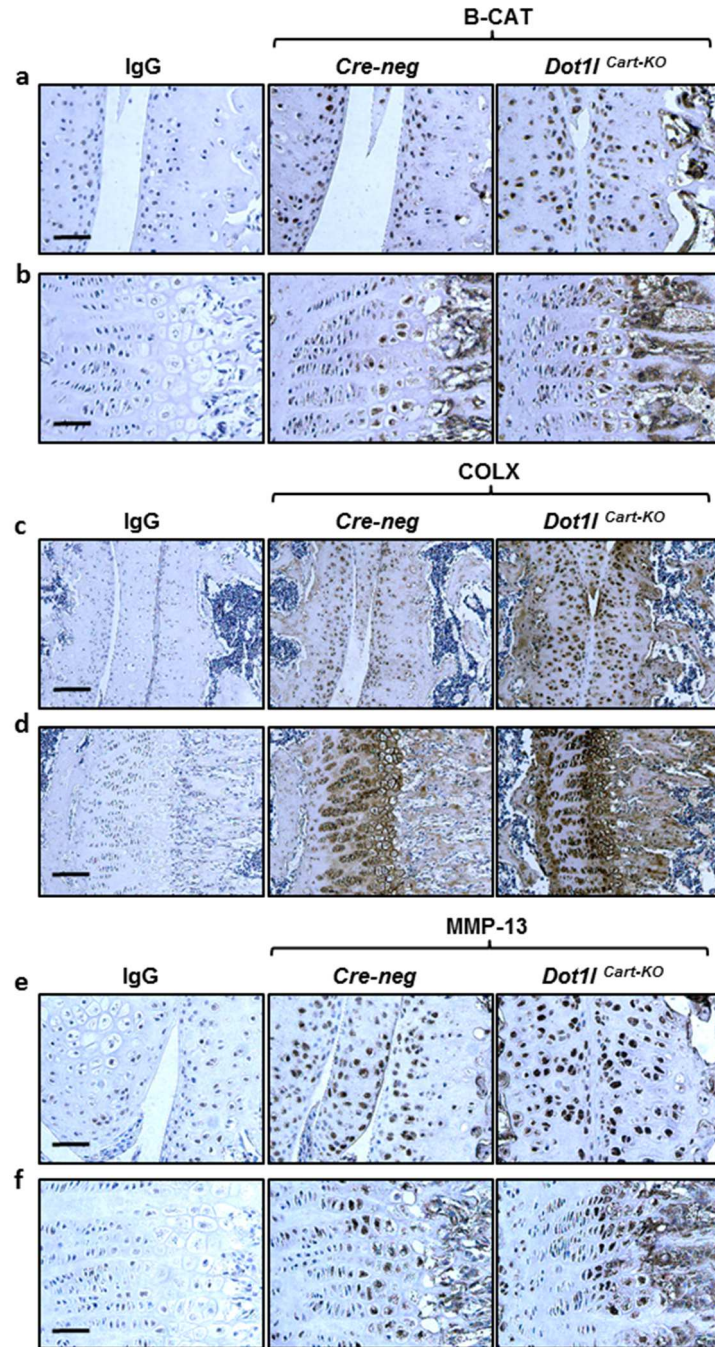

**Supplementary Figure 8 | Loss of DOT1L accelerates chondrocyte hypertrophy in cartilage-specific *Dot1l* knockout mice.** (a-f) Immunohistochemistry of B-CAT (a,b), COLX (c,d) and MMP13 (e,f) in the articular cartilage (a,c,e) and the growth plate (b,d,f) of 4-week-old *Cre-neg* and *Dot1l<sup>Cart-KO</sup>* mice. DOT1L loss did not result in detectable changes in B-CAT immunostaining. Hypertrophy markers COLX and MMP-13 are increased in *Dot1l<sup>Cart-KO</sup>* mice. The images are representative of 3 different animals. Scale bar, 50  $\mu$ m (a,b,e,f) or 100  $\mu$ m (c,d).

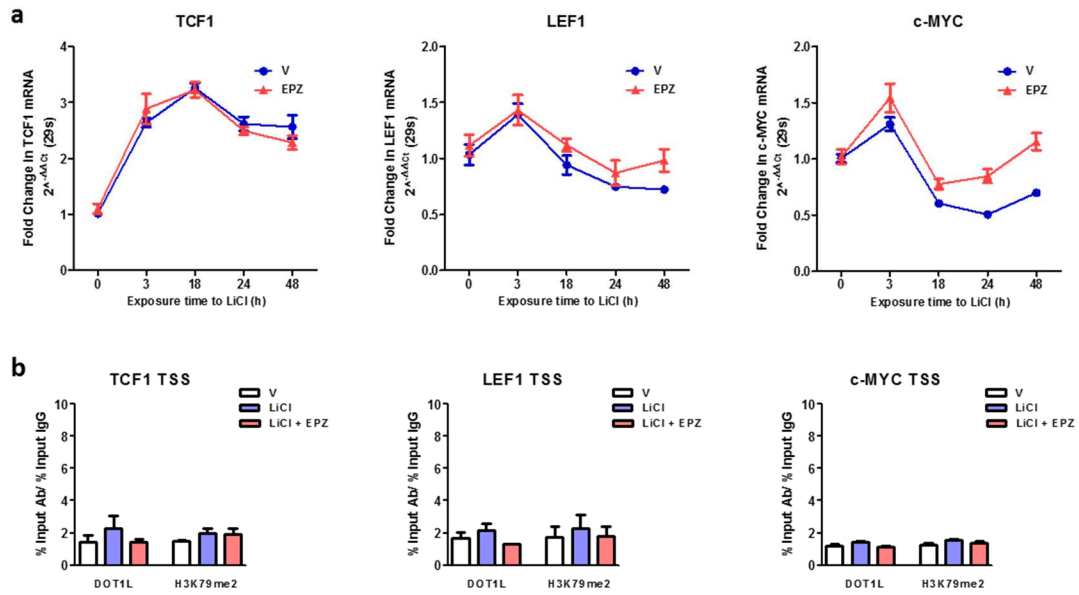

**Supplementary Figure 9 | The effect of DOT1L inhibition on Wnt target genes is absent in osteoblasts.** (a) *LEF1*, *TCF1* and *c-MYC* expression measured by quantitative PCR in human osteoblasts treated with EPZ-5676 and LiCl. Data are from one experiment with three technical replicates. (b) ChIP-qPCR analysis of DOT1L and methylated H3K79 on the transcriptional start site (TSS) of Wnt target genes in osteoblasts. Data are from two biologically independent experiments. Error bars indicate mean  $\pm$  s.e.m.

Uncropped blots Fig. 1c

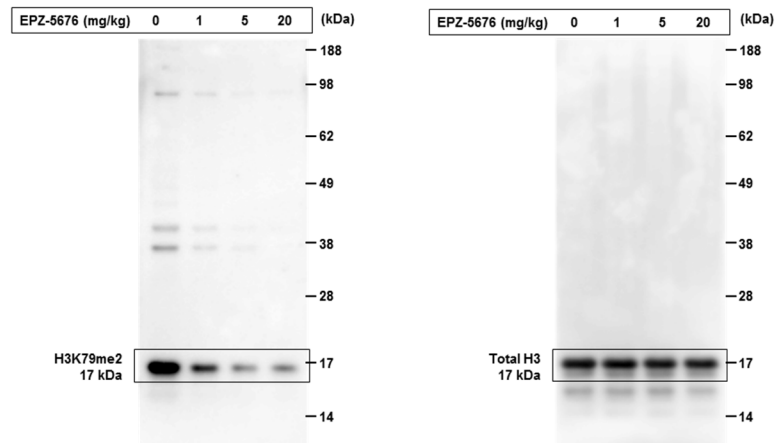

Uncropped blots Fig. 2b

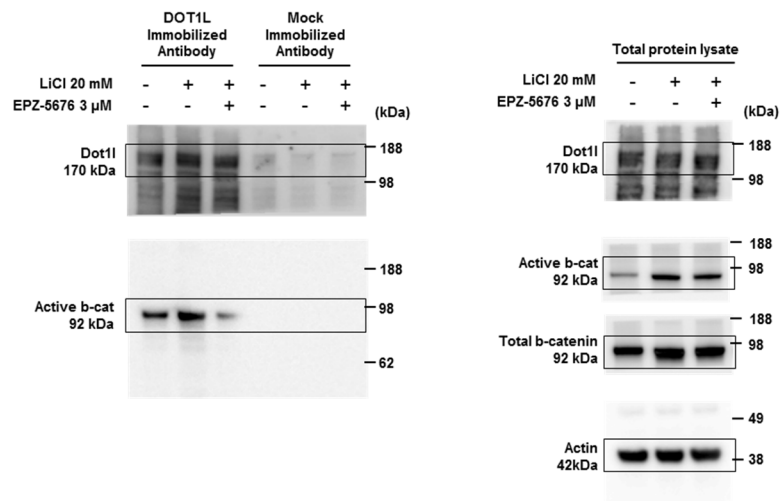

Uncropped blots Fig. 4e

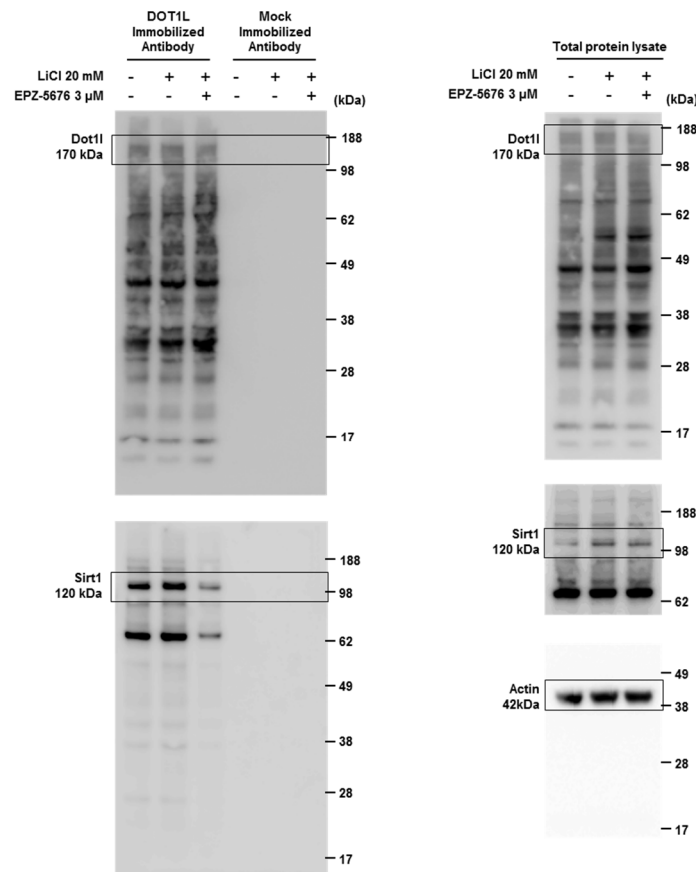

Uncropped blots Supplementary Fig. 1

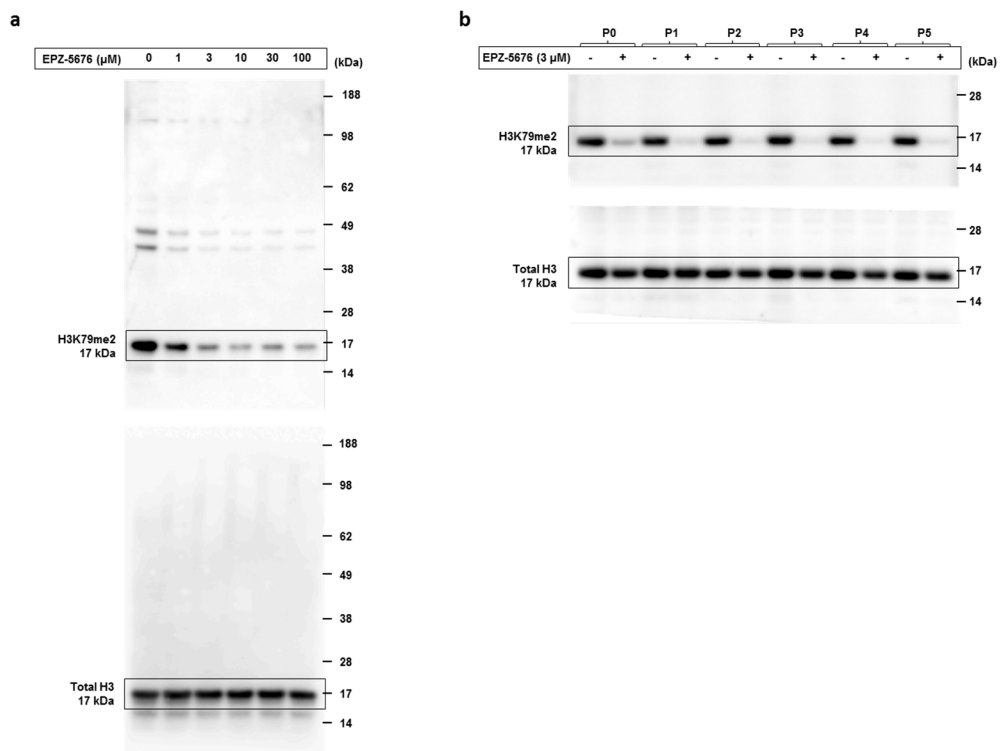

### Uncropped blots Supplementary Fig. 3a

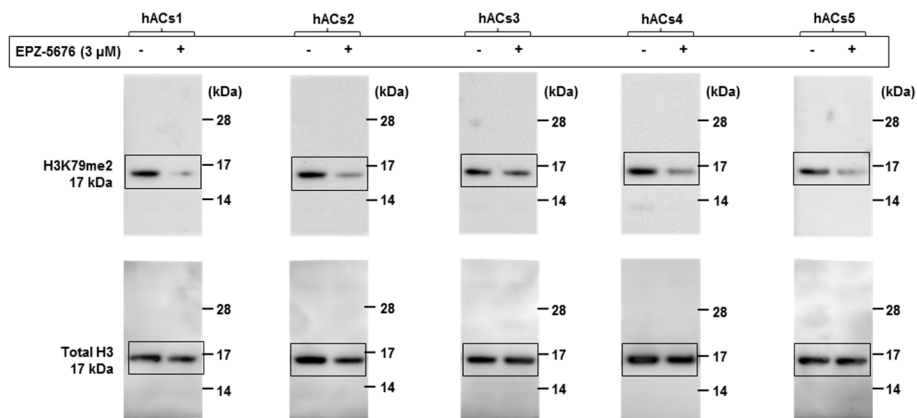

**Supplementary Figure 10 | Unprocessed original scans.** Uncropped images of scanned western blots and gels shown in the Figures are provided.

**Supplementary Table 1 | Top down- and upregulated genes upon DOT1L inhibition that were previously linked with cartilage biology.**

| Gene                     | Biological relevance                                   | Log ratio microarray |
|--------------------------|--------------------------------------------------------|----------------------|
| <i>Top downregulated</i> |                                                        |                      |
| <b>RGS5</b>              | Chondrocyte differentiation                            | -0,54782278          |
| <b>COL6A1</b>            | KO mice develop osteoarthritis                         | -0,541920087         |
| <b>SCUBE3</b>            | TGF $\beta$ receptor ligand                            | -0,476171007         |
| <b>FHL1</b>              | Downstream target of Wnt                               | -0,400055228         |
| <b>GDF10</b>             | Bmp family member                                      | -0,392016034         |
| <b>LOXL2</b>             | Collagen formation, chondrocyte differentiation        | -0,372004916         |
| <b>COL14A1</b>           | Plays an adhesive role by integrating collagen bundles | -0,308844443         |
| <b>ACAN</b>              | Extracellular matrix                                   | -0,305167395         |
| <b>IGFBP5</b>            | IGF pathway                                            | -0,304701203         |
| <i>Top upregulated</i>   |                                                        |                      |
| <b>CCL7</b>              | Upregulated in osteoarthritis                          | 1,038689032          |
| <b>CCL8</b>              | Upregulated in osteoarthritis                          | 0,796655267          |
| <b>MMP1</b>              | Degradation of extracellular matrix proteins           | 0,65190844           |
| <b>DKK1</b>              | Wnt modulator                                          | 0,573072224          |
| <b>SFRP1</b>             | Wnt modulator                                          | 0,570064988          |
| <b>CTHRC1</b>            | Inhibit collagen matrix synthesis                      | 0,56757143           |
| <b>IGF1</b>              | IGF pathway                                            | 0,516760007          |
| <b>EMILIN2</b>           | Wnt modulator                                          | 0,41962033           |
| <b>LEF1</b>              | Wnt direct target gene                                 | 0,404441205          |
| <b>GPNMB</b>             | New gene associated with osteoarthritis                | 0,32814179           |
| <b>DACT1</b>             | Wnt antagonist                                         | 0,309393924          |

**Supplementary Table 2 | siRNA catalog numbers.**

| <b>siRNA</b>      | <b>Catalog number</b> |
|-------------------|-----------------------|
| <b>siAF4</b>      | Qiagen, S104147437    |
| <b>siAF5</b>      | Qiagen, S104203101    |
| <b>siAF10</b>     | Qiagen, S100066444    |
| <b>siBCOR</b>     | Qiagen, S100311423    |
| <b>siCBX8</b>     | Qiagen, S100339255    |
| <b>siDOT1L</b>    | Invitrogen, AM51331   |
| <b>siGCN5</b>     | Qiagen, S100426118    |
| <b>siP300</b>     | Qiagen, S102622592    |
| <b>siPPARGC1A</b> | Qiagen, S100101024    |
| <b>siSCR</b>      | Qiagen, S103650318    |
| <b>siSIRT1</b>    | Qiagen, S100098434    |



**Supplementary Table 3 | Human primers used for qPCR.**

| <b>Primer name</b> | <b>Sequence</b>           |
|--------------------|---------------------------|
| <b>ACAN-Fw</b>     | ACAAGGTCTCACTGCCCAAC      |
| <b>ACAN-Rv</b>     | AATGGAACACGATGCCTGTC      |
| <b>CCL7-Fw</b>     | ATGAAAGCCTCTGCAGCACT      |
| <b>CCL7-Rv</b>     | CCAGCCTCTGCTTAGGGATT      |
| <b>CCL8-Fw</b>     | GTTTCTGCAGCGCTTCTGTG      |
| <b>CCL8-Rv</b>     | CACGTTAAAGCAGCAGGTGA      |
| <b>CHI3L2-Fw</b>   | CCCTTATCACTGGCCACAAC      |
| <b>CHI3L2-Rv</b>   | CCACCTTCTCTGATGGCATT      |
| <b>c-MYC-Fw</b>    | TTTCGGGTAGTGGAAAACCA      |
| <b>c-MYC-Rv</b>    | GCTCGAATTTCTTCCAGATATCCTC |
| <b>COL1A1-Fw</b>   | AAGAGGAAGGCCAAGTCGAG      |
| <b>COL1A1-Rv</b>   | CACACGTCTCGGTCATGGTA      |
| <b>COL2A1-Fw</b>   | GCACCTGCAGAGACCTGAAA      |
| <b>COL2A1-Rv</b>   | GTCTCGCCAGTCTCCATGTT      |
| <b>COL6A1-Fw</b>   | ATCGACAACCTGAGGGACAG      |
| <b>COL6A1-Rv</b>   | TGATAGCGCAGTCGGTGTAG      |
| <b>COL14A1-Fw</b>  | TTCAAGGCCTTATGCCAGAC      |
| <b>COL14A1-Rv</b>  | ACTCTGGGCTTTGGATCCTT      |
| <b>CTHRC1-Fw</b>   | TCGAGCGCCTCTGAGATTAT      |
| <b>CTHRC1-Rv</b>   | CTTTGAATCCATCCCGACCT      |
| <b>DACT1-Fw</b>    | AGTCGCCTGGAGGAGAAGTT      |
| <b>DACT1-Rv</b>    | GCTCTTGCAACTGATTCAACAA    |
| <b>DKK1-Fw</b>     | CGGGAATTACTGCAAAAATGG     |
| <b>DKK1-Rv</b>     | ACCCATCCAAGGTGCTATGA      |
| <b>EDNRA-Fw</b>    | AATGGCAGCTTGAGAATTGC      |
| <b>EDNRA-Rv</b>    | TGAAGAGGGAACCAGCAAAG      |
| <b>EMILIN2-Fw</b>  | GGCTTTAGAGGGGGAGATTG      |
| <b>EMILIN2-Rv</b>  | TTGGGGACAAAGTCTTCCTG      |
| <b>FHL1-Fw</b>     | TGGCTCTGGAGCTAATTTGG      |
| <b>FHL1-Rv</b>     | GGCCATCCTTTTGCACATAC      |
| <b>FRZB-Fw</b>     | GAGGAGCTGCCAGTGTACGA      |
| <b>FRZB-Rv</b>     | ACTGCTTGCCCCTCTACAGTT     |
| <b>GDF10-Fw</b>    | GTCCACATGCACAGGCTCTAT     |
| <b>GDF10-Rv</b>    | TGCATGGAAGTCAGGTTGAA      |
| <b>GPNMB-Fw</b>    | TTCCTGGGATTTCTGCTCCT      |
| <b>GPNMB-Rv</b>    | TGTGCTCCCTCATGTAAGCA      |
| <b>HEY2-Fw</b>     | TGGGGAGCGAGAACAATTAC      |
| <b>HEY2-Rv</b>     | CCTCTCCTTTTCTTTCTTGCCATA  |
| <b>IGF1-Fw</b>     | CAGCAGTCTTCCAACCCAAT      |

|                    |                        |
|--------------------|------------------------|
| <b>IGF1-Rv</b>     | ACAGCGCCAGGTAGAAGAGA   |
| <b>IGFBP5-Fw</b>   | GGTTTGCCTCAACGAAAAGA   |
| <b>IGFBP5-Rv</b>   | AGTAGGTCTCCTCGGCCATC   |
| <b>ITGB3-Fw</b>    | GTGTGCCTGGTGCTCTGATG   |
| <b>ITGB3-Rv</b>    | ACTCACTGGGAACCTCGATGG  |
| <b>LEF1-Fw</b>     | CAGTCATCCCGAAGAGGAAG   |
| <b>LEF1-Rv</b>     | AGGGCTCCTGAGAGGTTTGT   |
| <b>LOXL2-Fw</b>    | CCTGGGGAGAGGACATACAAT  |
| <b>LOXL2-Rv</b>    | AGCTTGCAGCTGGAGATGTG   |
| <b>MATN3-Fw</b>    | GACAGAACAGGGTCCCATCA   |
| <b>MATN3-Rv</b>    | TGAGAGCCTAGGGCACACTT   |
| <b>MMP1-Fw</b>     | TTCGGGGAGAAGTGATGTTC   |
| <b>MMP1-Rv</b>     | GTCGGCAAATTCGTAAGCAG   |
| <b>MMP3-Fw</b>     | GGCCAGGGATTAATGGAGAT   |
| <b>MMP3-Rv</b>     | TGAAAGAGACCCAGGGAGTG   |
| <b>NOTCH3-Fw</b>   | GTGTGCAAATGGAGGTCGT    |
| <b>NOTCH3-Rv</b>   | CCACTGAACTCTGGCAGACA   |
| <b>RGS5-Fw</b>     | TCAGTTGGTGACCTTGTCATTC |
| <b>RGS5-Rv</b>     | TTGTTCTGCAGGAGTTTGTCC  |
| <b>RIPK4-Fw</b>    | CTTCGGGCAGGTGTACAAGG   |
| <b>RIPK4-Rv</b>    | TTCTTCCAAAAGCTCCATGC   |
| <b>S29-Fw</b>      | CCAGCAGCTCTACTGGAGTCA  |
| <b>S29-Rv</b>      | GCCTATGTCCTTCGCGTACT   |
| <b>S100B-Fw</b>    | AGGGAGACAAGCACAAGCTG   |
| <b>S100B-Rv</b>    | GAAGTCACATTCGCCGTCTC   |
| <b>SCUBE3-Fw</b>   | CGGACACAACCTGTCTGGATG  |
| <b>SCUBE3-Rv</b>   | GTTGTGCTGAGGAAGAAGC    |
| <b>SERPINA1-Fw</b> | GGGAAACTACAGCACCTGGA   |
| <b>SERPINA1-Rv</b> | CCCCATTGCTGAAGACCTTA   |
| <b>SFRP1-Fw</b>    | CAAGCCCCAAGGCACAAC     |
| <b>SFRP1-Rv</b>    | TTCATCCTCAGTGCAAACCTCG |
| <b>SLIT3-Fw</b>    | CCAGGATCACCAAGATGGAC   |
| <b>SLIT3-Rv</b>    | CGCTCTAGCTGCTTCAGGTC   |
| <b>SOX9-Fw</b>     | GGTGCTCAAAGGCTACGACT   |
| <b>SOX9-Rv</b>     | GTAATCCGGGTGTCCTTCT    |
| <b>TCF1-Fw</b>     | CACCCATCCTCAAAGAGCTG   |
| <b>TCF1-Rv</b>     | ATGTTGTGCTGCTGCAGGTA   |

**Supplementary Table 4 | Human primers used for ChIP-qPCR.**

| <b>Primer name</b>      | <b>Sequence</b>      |
|-------------------------|----------------------|
| <b>c-MYCpromoter-Fw</b> | CCGCCTGCGATGATTTATAC |
| <b>c-MYCpromoter-Rv</b> | GCTCCCTCTCAAACCCTCTC |
| <b>c-MYC-TSS-Fw</b>     | GGCACTTTGCACTGGAAGTT |
| <b>c-MYC-TSS-Rv</b>     | CTTTCAGAGAAGCGGGTCCT |
| <b>LEF1promoter-Fw</b>  | AGCAATTGGCAGCCCTATTT |
| <b>LEF1promoter-Rv</b>  | TGCAAACCAGTCTGCTGAAC |
| <b>LEF1-TSS-Fw</b>      | AGAAAAACCGAAGCGAAAGG |
| <b>LEF1-TSS-Rv</b>      | AACGAAACGTCCACTTCCTG |
| <b>TCF1promoter-Fw</b>  | AGTAAGCGGGGTCAGGAGTT |
| <b>TCF1promoter-Rv</b>  | CCACTCGGCATAGCCTTAAA |
| <b>TCF1TSS-Fw</b>       | AGCTCGCGGAGCCGCTCTGC |
| <b>TCF1-TSS-Rv</b>      | GGGGCGCGGGGCGCTGGGCG |
